# Supplementary material for: Fish rubbings, ‘gyotaku’, as a source of historical biodiversity data
Source: Zookeys. 2020 Jan 16;904:89–101. doi: 10.3897/zookeys.904.47721 (PMC6983646; doi:10.3897/zookeys.904.47721)
Supplement: Supplementary material 1 [file zookeys-904-089-s001.xlsx]

## Sheet: Sheet1
Appendix 1. The attributed information of the gyotaku rubbnigs observed in the present study. Although the identifications of each individual gyotaku have not been validated via scientific means, the Latin names provided are provisional based on the fish names given by their artists with our suggestions.
Region	Gyotaku sheet ID	Individual ID	Type of shop	Shop ID	Fish name (original)	Fish name (English)	Scientific name	Date	Time	Locality (original)	Locality (English)	Ship shop (original)	Ship shop (English)	Length (cm)	Weight (kg)	Database
Hokkaido	H1	1H	Tackles and bait shop	A	虹鱒	Nijimasu	Oncorhynchus mykiss (Walbaum, 1792)	2007-03-18	06:00:00	後志利別川本流	The main stream of the Shiribeshi-toshibetsu River			73	4.5	https://zukan.com/gyotaku/leaf109676
Hokkaido	H2	2H	Tackles and bait shop	A	やまべ	Yamabe	Oncorhynchus masou masou (Brevoort, 1856)	2001-07-18	about 19:30	遊楽部川	Yuurappu River			31		https://zukan.com/gyotaku/leaf109677
Hokkaido	H3		Tackles and bait shop	A	ヤマベ	Yamabe	Oncorhynchus masou masou (Brevoort, 1856)	2003-08-14	about 19:00	砂蘭部川	Saranbe River			31.5		https://zukan.com/gyotaku/leaf109678
Hokkaido	H4	4H	Tackles and bait shop	A	やまべ	Yamabe	Oncorhynchus masou masou (Brevoort, 1856)	2005-08-07	05:40:00	尻別川本流	The main stream of the Shiribetsu River			30		https://zukan.com/gyotaku/leaf109679
Hokkaido	H5	5H	Tackles and bait shop	A	ヤマベ	Yamabe	Oncorhynchus masou masou (Brevoort, 1856)	2001-07-13	19:30:00	砂蘭部川	Saranbe River			32		https://zukan.com/gyotaku/leaf109680
Hokkaido	H6	6H	Tackles and bait shop	A	やまべ	Yamabe	Oncorhynchus masou masou (Brevoort, 1856)	2004-09-01	11:30:00	尻別川本流	The main stream of the Shiribetsu River			31.7		https://zukan.com/gyotaku/leaf109681
Hokkaido	H7	7H	Tackles and bait shop	A	ヤマベ	Yamabe	Oncorhynchus masou masou (Brevoort, 1856)	2005-06-22	14:00:00	尻別川本流	The main stream of the Shiribetsu River			32		https://zukan.com/gyotaku/leaf109682
Hokkaido	H8	8H	Tackles and bait shop	A	やまべ	Yamabe	Oncorhynchus masou masou (Brevoort, 1856)	2001-07-22	08:00:00	砂蘭部川	Saranbe River			31		https://zukan.com/gyotaku/leaf109683
Hokkaido	H9	9H	Tackles and bait shop	A	ヤマベ	Yamabe	Oncorhynchus masou masou (Brevoort, 1856)	2001-07-15	05:15:00	砂蘭部川	Saranbe River			31		https://zukan.com/gyotaku/leaf109684
Hokkaido	H10	10H	Tackles and bait shop	A	ヤマベ	Yamabe	Oncorhynchus masou masou (Brevoort, 1856)	2005-07-14	05:30:00	砂蘭部川	Saranbe River			30.7		https://zukan.com/gyotaku/leaf109685
Hokkaido	H11	11H	Tackles and bait shop	A	やまべ	Yamabe	Oncorhynchus masou masou (Brevoort, 1856)	2005-08-07	13:00:00	砂蘭部川	Saranbe River			31.3		https://zukan.com/gyotaku/leaf109686
Hokkaido	H12	12H	Tackles and bait shop	A	やまべ	Yamabe	Oncorhynchus masou masou (Brevoort, 1856)	2006-07-23	06:00:00	砂蘭部川	Saranbe River			31.5		https://zukan.com/gyotaku/leaf109687
Hokkaido	H13	13H	Tackles and bait shop	A	やまべ	Yamabe	Oncorhynchus masou masou (Brevoort, 1856)	2005-08-13	08:00:00	尻別川本流	The main stream of the Shiribetsu River			31		https://zukan.com/gyotaku/leaf109688
Hokkaido	H14	14H	Tackles and bait shop	A	やまべ	Yamabe	Oncorhynchus masou masou (Brevoort, 1856)	2006-08-25	05:30:00	砂蘭部川	Saranbe River			32		https://zukan.com/gyotaku/leaf109689
Hokkaido	H15	15H	Tackles and bait shop	A	虹鱒	Nijimasu	Oncorhynchus mykiss (Walbaum, 1792)	2006-08-27	06:00:00	真駒内ダム	Makomanai Dam			56		https://zukan.com/gyotaku/leaf109690
Hokkaido	H16	16H	Tackles and bait shop	A	やまべ	Yamabe	Oncorhynchus masou masou (Brevoort, 1856)	2008-07-04	07:00:00	砂蘭部川	Saranbe River			30		https://zukan.com/gyotaku/leaf109691
Hokkaido	H17	17H	Tackles and bait shop	A	鮭	Sake	Oncorhynchus keta (Walbaum, 1792)	2005-09-29	06:30:00	野田追川河口	The mouth of Nodaoi River				9.2	https://zukan.com/gyotaku/leaf109692
Hokkaido	H18	18H	Tackles and bait shop	A	鮭	Sake	Oncorhynchus keta (Walbaum, 1792)	2003-11-14		中の沢沖	off Nakanosawa	長万部 第三十八 たか丸	38th Takamaru, Oshamanbe		8.7	https://zukan.com/gyotaku/leaf109693
Hokkaido	H19	19H	Tackles and bait shop	A	虹鱒	Nijimasu	Oncorhynchus mykiss (Walbaum, 1792)			ピリカダム	Pirka Dam			61		https://zukan.com/gyotaku/leaf109694
Hokkaido	H20	20H	Tackles and bait shop	A	岩魚	Iwana	Salvelinus leucomaenis (Pallas, 1814)	1999-05-16						50		https://zukan.com/gyotaku/leaf109695
Hokkaido	H21	21H	Tackles and bait shop	A	鮭	Sake	Oncorhynchus keta (Walbaum, 1792)	1985-12-13	07:30:00	花浦海岸	The coast of Hanaura				9.1	https://zukan.com/gyotaku/leaf109696
Hokkaido	H22	22H	Tackles and bait shop	A	鮭	Sake	Oncorhynchus keta (Walbaum, 1792)	1997-11-16		国縫沖	off Kun-nui				9	https://zukan.com/gyotaku/leaf109697
Hokkaido	H23	23H	Tackles and bait shop	A												https://zukan.com/gyotaku/leaf109698
Hokkaido	H24	24H	Tackles and bait shop	B	いしがれい	Ishigarei	Kareius bicoloratus (Basilewsky, 1855)	2006-10-18	08:10:00	長万部町 国縫沖	off Kun-nui, Oshamanbe Town			58.5	2.56	https://zukan.com/gyotaku/leaf109360
Hokkaido	H25	25H	Tackles and bait shop	B	まがれい	Magarei	Pleuronectes herzensteini (Jordan & Snyder, 1901)	1998-04-17		瀬棚港東防波堤	The east breakwater of the Setana Port			47	1.52	https://zukan.com/gyotaku/leaf109361
Hokkaido	H26	26H	Tackles and bait shop	B	雨鱒	Amemasu	Salvelinus leucomaenis leucomaenis (Pallas, 1814)	1998-03-09		須築漁港	Sukki Fishing Port			76	4.12	https://zukan.com/gyotaku/leaf109362
Hokkaido	H27	27H	Tackles and bait shop	B	くろぞい	Kurozoi	Sebastes schlegelii Hilgendorf, 1880	1996-06-22	20:15:00	北桧山町日昼部沖	off Nicchuube, Kitahiyama Town			64.5	3.95	https://zukan.com/gyotaku/leaf109363
Hokkaido	H28	28H	Tackles and bait shop	B	まぞい	Mazoi	Sebastes sp.	2008-03-29		せたな町瀬棚区須築漁港	Sukki Fishing Port, Setana-ku, Setana Town			41	1.2	https://zukan.com/gyotaku/leaf109364
Hokkaido	H29	29H	Tackles and bait shop	B	こぶだい	Kobudai	Semicossyphus reticulatus (Valenciennes, 1839)	2008-07-12	16:30:00	松前郡松前町小島漁港	Kojima Fishing Port, Matsumae Town, Matsumae County			71	6.78	https://zukan.com/gyotaku/leaf109365
Hokkaido	H30	30H	Tackles and bait shop	B	くろがしら	Kurogashira	Pleuronectes schrenki (Schmidt, 1904)	2006-06-04		室蘭港西1号埠頭	West 1st Pier of the Muroran Port			53	2.1	https://zukan.com/gyotaku/leaf109366
Hokkaido	H31	31H	Tackles and bait shop	B	くろがしら	Kurogashira	Pleuronectes schrenki (Schmidt, 1904)	2003-06-08	13:30:00	室蘭港西2号埠頭	West 2nd Pier of the Muroran Port			45	1.36	https://zukan.com/gyotaku/leaf109367
Hokkaido	H32	32H	Tackles and bait shop	B	ひらめ	Hirame	Paralichthys olivaceus (Temminck & Schlegel, 1846)	2001-09-16	12:30:00	北桧山町水垂岬沖	off Cape Midare, Kitahiyama Town			102	10.06	https://zukan.com/gyotaku/leaf109368
Hokkaido	H33	33H	Tackles and bait shop	B	鮃	Hirame	Paralichthys olivaceus (Temminck & Schlegel, 1846)	2018-07-14		瀬棚港北沖防波堤	The north offshore breakwater of the Setana Port			88	6.34	https://zukan.com/gyotaku/leaf109369
Hokkaido	H34	34H	Tackles and bait shop	B	やまめ	Yamame	Oncorhynchus masou masou (Brevoort, 1856)	2000-08-13		利別目名川	Toshibetsu-mena River			33.5		https://zukan.com/gyotaku/leaf109370
Hokkaido	H35	35H	Tackles and bait shop	D	そい	Soi	Sebastes sp.	2007-11-25		上ノ国町白坂	Shirasaka, Kaminokuni Town			58	2.99	https://zukan.com/gyotaku/leaf109424
Hokkaido	H36	36H	Tackles and bait shop	D				ca. 2004		江ノ島（島牧村）	Enoshima (Shimamaki Village)					https://zukan.com/gyotaku/leaf109425
Hokkaido	H37	37H	Tackles and bait shop	D	クロダイ	Kurodai	Acanthopagrus schlegelii (Bleeker, 1854)	1992-04-11		九州対馬	Tsushima, Kyushu			43		https://zukan.com/gyotaku/leaf109426
Hokkaido	H38	38H	Tackles and bait shop	D	鮎	Ayu	Plecoglossus altivelis altivelis (Temminck & Schlegel, 1846)	1991-09-22		球磨川・那良口	Naraguchi, Kuma River			30.5	0.32	https://zukan.com/gyotaku/leaf109427
Hokkaido	H39	39H	Tackles and bait shop	C	にじます	Nijimasu	Oncorhynchus mykiss (Walbaum, 1792)	2001-11-04		春別川	Harubetsu River			55	2.5	https://zukan.com/gyotaku/leaf109371
Hokkaido	H40	40H	Tackles and bait shop	C	やまめ	Yamame	Oncorhynchus masou masou (Brevoort, 1856)	1999-08-15		沙留々川	Saruru River			38	0.7	https://zukan.com/gyotaku/leaf109372
Hokkaido	H41	41H	Tackles and bait shop	C	ブラウン	Brown	Salmo trutta Linnaeus, 1758	1999-09-19		新冠ダム	Niikappu Dam			47	1.18	https://zukan.com/gyotaku/leaf109373
Hokkaido	H42	42H	Tackles and bait shop	C	イワナ	Iwana	Salvelinus leucomaenis leucomaenis (Pallas, 1814)	1999-07-17		佐幌ダム	Sahoro Dam			53		https://zukan.com/gyotaku/leaf109374
Hokkaido	H43	43H	Tackles and bait shop	C	やまめ	Yamame	Oncorhynchus masou masou (Brevoort, 1856)	1998-07-18		新冠川	Niikappu River			36		https://zukan.com/gyotaku/leaf109375
Hokkaido	H44	44H	Tackles and bait shop	C	𩹷	Itou	Hucho perryi (Brevoort, 1856)	1993-07-05		金山湖	Lake Kanayama			102	12	https://zukan.com/gyotaku/leaf109376
Hokkaido	H45	45H	Tackles and bait shop	C	ブラウン	Brown	Salmo trutta Linnaeus, 1758	1993-06-06		新冠ダム湖	Lake Niikappu Dam			75	5	https://zukan.com/gyotaku/leaf109377
Hokkaido	H46	46H	Tackles and bait shop	C	スチールヘット	Steelhead	Oncorhynchus mykiss (Walbaum, 1792)	1993-10-11		静内川	Shizunai River			75	4.5	https://zukan.com/gyotaku/leaf109378
Hokkaido	H47	47H	Tackles and bait shop	C						新冠川	Niicappu River					https://zukan.com/gyotaku/leaf109379
Hokkaido	H48	48H	Tackles and bait shop	C	ブラウン	Brown	Salmo trutta Linnaeus, 1758	1998-11-02		下新冠ダム	Shimo-niikappu River			66		https://zukan.com/gyotaku/leaf109380
Hokkaido	H49	49H	Tackles and bait shop	C	𩹷 いとう	Itou	Hucho perryi (Brevoort, 1856)	1993-06-24		金山湖	Lake Kanayama			106	13	https://zukan.com/gyotaku/leaf109381
Hokkaido	H50	50H	Tackles and bait shop	C	ブラウン	Brown	Salmo trutta Linnaeus, 1758	1996-06-13		静内川双川ダム直下	The diectly under the Futa River Dam, Shizunai River			76	7	https://zukan.com/gyotaku/leaf109382
Hokkaido	H51	51H	Tackles and bait shop	C	𩹷 いとう	Itou	Hucho perryi (Brevoort, 1856)	1986-09-21		金山湖	Lake Kanayama			92	7.3	https://zukan.com/gyotaku/leaf109383
Hokkaido	H52	52H	Tackles and bait shop	C												https://zukan.com/gyotaku/leaf109384
Hokkaido	H52	53H	Tackles and bait shop	C												https://zukan.com/gyotaku/leaf109384
Hokkaido	H53	54H	Tackles and bait shop	C	ブラウン	Brown	Salmo trutta Linnaeus, 1758	1987-06-04		春別ダム	Harubetsu Dam			56	1.7	https://zukan.com/gyotaku/leaf109385
Hokkaido	H54	55H	Tackles and bait shop	C	あめます	Amemasu	Salvelinus leucomaenis leucomaenis (Pallas, 1814)	1988-04-10		沙流川	Saru River			58	1.5	https://zukan.com/gyotaku/leaf109386
Hokkaido	H55	56H	Tackles and bait shop	C	ブラウン	Brown	Salmo trutta Linnaeus, 1758	1996-07-15		静内川西の沢	Nishinosawa, Shizunai River			70	4.2	https://zukan.com/gyotaku/leaf109387
Hokkaido	H56	57H	Tackles and bait shop	C	ブラウン	Brown	Salmo trutta Linnaeus, 1758	2000-10-14		下新冠ダム	Shimo-niikappu Dam			50		https://zukan.com/gyotaku/leaf109388
Hokkaido	H57	58H	Tackles and bait shop	C	𩹷	Itou	Hucho perryi (Brevoort, 1856)	2001-06-23		金山湖	Lake Kanayama			103	11	https://zukan.com/gyotaku/leaf109389
Hokkaido	H58	59H	Tackles and bait shop	C	ブラウン	Brown	Salmo trutta Linnaeus, 1758	2003-06-05		支笏湖	Lake Shikotsu			63	3.2	https://zukan.com/gyotaku/leaf109390
Hokkaido	H59	60H	Tackles and bait shop	C	ブラウン	Brown	Salmo trutta Linnaeus, 1758	2003-05-02		新冠	Niikappu			65	3	https://zukan.com/gyotaku/leaf109391
Hokkaido	H60	61H	Tackles and bait shop	C	あめます	Amemasu	Salvelinus leucomaenis leucomaenis (Pallas, 1814)	2003-04-12		沙流川河口	The mouth of Saru River			70		https://zukan.com/gyotaku/leaf109392
Hokkaido	H61	62H	Tackles and bait shop	C	ブラウン	Brown	Salmo trutta Linnaeus, 1758	2003-05-20		静内川	Shizunai River			75	4.7	https://zukan.com/gyotaku/leaf109393
Hokkaido	H62	63H	Tackles and bait shop	C				ca. 1994		つり堀イザワ	Izawa Fishing Pond					https://zukan.com/gyotaku/leaf109393
Hokkaido	H62	64H	Tackles and bait shop	C				ca. 1994		つり堀イザワ	Izawa Fishing Pond					https://zukan.com/gyotaku/leaf109393
Hokkaido	H62	65H	Tackles and bait shop	C				ca. 1994		つり堀イザワ	Izawa Fishing Pond					https://zukan.com/gyotaku/leaf109393
Hokkaido	H62	66H	Tackles and bait shop	C				ca. 1994		つり堀イザワ	Izawa Fishing Pond					https://zukan.com/gyotaku/leaf109393
Hokkaido	H62	67H	Tackles and bait shop	C				ca. 1994		つり堀イザワ	Izawa Fishing Pond					https://zukan.com/gyotaku/leaf109393
Hokkaido	H63	68H	Tackles and bait shop	C				ca. 1994		シラウ川	Shirau River					https://zukan.com/gyotaku/leaf109394
Hokkaido	H63	69H	Tackles and bait shop	C				ca. 1994		シラウ川	Shirau River					https://zukan.com/gyotaku/leaf109394
Hokkaido	H64	70H	Tackles and bait shop	C				ca. 1994		新冠川	Niikappu River					https://zukan.com/gyotaku/leaf109395
Hokkaido	H64	71H	Tackles and bait shop	C				ca. 1994		新冠川	Niikappu River					https://zukan.com/gyotaku/leaf109395
Hokkaido	H65	72H	Tackles and bait shop	C				ca. 1994		シラウ川	Shirau River					https://zukan.com/gyotaku/leaf109396
Hokkaido	H65	73H	Tackles and bait shop	C				ca. 1994		シラウ川	Shirau River					https://zukan.com/gyotaku/leaf109396
Hokkaido	H66	74H	Tackles and bait shop	C				ca. 1994		シラウ川	Shirau River					https://zukan.com/gyotaku/leaf109397
Hokkaido	H67	75H	Tackles and bait shop	C	あめます	Amemasu	Salvelinus leucomaenis leucomaenis (Pallas, 1814)	2003-03-15		門別河口	The river mouth of Monbetsu			67		https://zukan.com/gyotaku/leaf109398
Hokkaido	H68	76H	Tackles and bait shop	C	ブラウン	Brown	Salmo trutta Linnaeus, 1758	2001-06-25		静内川本流	The main stream of the Shizunai River			63	3.2	https://zukan.com/gyotaku/leaf109399
Hokkaido	H69	77H	Tackles and bait shop	C	𩹷（いとう）	Itou	Hucho perryi (Brevoort, 1856)	1985-10-21		金山湖	Lake Kanayama			75	4.15	https://zukan.com/gyotaku/leaf109400
Hokkaido	H70	78H	Tackles and bait shop	C	𩹷（いとう）	Itou	Hucho perryi (Brevoort, 1856)	1985-10-21		金山湖	Lake Kanayama			73	3.6	https://zukan.com/gyotaku/leaf109401
Hokkaido	H71	79H	Tackles and bait shop	C	𩹷（いとう）	Itou	Hucho perryi (Brevoort, 1856)	1988-06-30		金山湖	Lake Kanayama			97	9.8	https://zukan.com/gyotaku/leaf109402
Hokkaido	H72	80H	Tackles and bait shop	C				1988-10-01		富浜	Tomihama					https://zukan.com/gyotaku/leaf109403
Hokkaido	H73	81H	Tackles and bait shop	C	アメマス	Amemasu	Salvelinus leucomaenis leucomaenis (Pallas, 1814)	1983-03-27		静内川	Shizunai River			57.5	1.33	https://zukan.com/gyotaku/leaf109404
Hokkaido	H74	82H	Tackles and bait shop	C	アメマス	Amemasu	Salvelinus leucomaenis leucomaenis (Pallas, 1814)	1982-05-30		シノダイ岬	Cape Shinodai			55	1.45	https://zukan.com/gyotaku/leaf109405
Hokkaido	H75	83H	Tackles and bait shop	C	アカハラ	Akahara	Tribolodon hakonensis (Günther, 1880)	1982-05-05		富川 川尻	The river mouth, Tomikawa			52	1.67	https://zukan.com/gyotaku/leaf109406
Hokkaido	H76	84H	Tackles and bait shop	C	あめます	Amemasu	Salvelinus leucomaenis leucomaenis (Pallas, 1814)	1982-05-03		金山湖	Lake Kanayama			55	1.85	https://zukan.com/gyotaku/leaf109407
Hokkaido	H77	85H	Tackles and bait shop	C	ブラウントラウト	Brown trout	Salmo trutta Linnaeus, 1758	1982-04-29		下新冠ダム	Shimo-niikappu Dam			46	1.17	https://zukan.com/gyotaku/leaf109408
Hokkaido	H78	86H	Tackles and bait shop	C	ブラウン	Brown	Salmo trutta Linnaeus, 1758	1987-07-06		静内川上流	The upper stream of the Shizunai River			66	3.6	https://zukan.com/gyotaku/leaf109409
Hokkaido	H78	87H	Tackles and bait shop	C	ブラウン	Brown	Salmo trutta Linnaeus, 1758	1987-07-06		静内川上流	The upper stream of the Shizunai River			62	2.9	https://zukan.com/gyotaku/leaf109410
Hokkaido	H79	88H	Tackles and bait shop	C	ヤマベ	Yamabe	Oncorhynchus masou masou (Brevoort, 1856)	1982-06-12		豊浦貫気別川	Nukkibetsu River, Toyoura			31		https://zukan.com/gyotaku/leaf109411
Hokkaido	H80	89H	Tackles and bait shop	C	アメマス	Amemasu	Salvelinus leucomaenis leucomaenis (Pallas, 1814)	1983-03-19		静内川	Shizunai River			54.5	1.1	https://zukan.com/gyotaku/leaf109412
Hokkaido	H81	90H	Tackles and bait shop	C	鷹の羽	Takanoha	Verasper moseri Jordan & Gilbert, 1898	1982-09-07		東静内	Higashi-shizunai			68	4.1	https://zukan.com/gyotaku/leaf109413
Hokkaido	H82	91H	Tackles and bait shop	C	あめます	Amemasu	Salvelinus leucomaenis leucomaenis (Pallas, 1814)	1982-04-05		新冠川	Niicappu River			64.5	1.68	https://zukan.com/gyotaku/leaf109414
Hokkaido	H83	92H	Tackles and bait shop	E												-
Tokyo Bay	T1	1T	Tackles and bait shop	F	石垣鯛	Ishigakidai	Oplegnathus punctatus (Temminck & Schlegel, 1844)	1985-05-13		銭洲	Zenisu			43.5	1.95	https://zukan.com/gyotaku/leaf109548
Tokyo Bay	T2	2T	Tackles and bait shop	F	石垣鯛	Ishigakidai	Oplegnathus punctatus (Temminck & Schlegel, 1844)	1985-05-13		銭洲	Zenisu				2.1	https://zukan.com/gyotaku/leaf109549
Tokyo Bay	T3	3T	Tackles and bait shop	F	めじな	Mejina	Girella punctata Gray, 1835	1980-05-18		大瀬赤島	Akajima, Oose				1.14	https://zukan.com/gyotaku/leaf109550
Tokyo Bay	T4	4T	Tackles and bait shop	F	虹鱒	Nijimasu	Oncorhynchus mykiss (Walbaum, 1792)	1984-10-29		芦の湖	Lake Ashino			45	0.76	https://zukan.com/gyotaku/leaf109551
Tokyo Bay	T5	5T	Tackles and bait shop	F	黒鯛	Kurodai	Acanthopagrus schlegelii (Bleeker, 1854)	1984-11-15		木更津	Kisarazu			45.5	1.65	https://zukan.com/gyotaku/leaf109552
Tokyo Bay	T6	6T	Tackles and bait shop	F	舞鯛	Budai	Calotomus japonicus (Valenciennes, 1840)	1981-08-08		雲見	Kumomi			47		https://zukan.com/gyotaku/leaf109553
Tokyo Bay	T7	7T	Tackles and bait shop	F	本ガツオ	Hongatsuo	Katsuwonus pelamis (Linnaeus, 1758)	1981-08-08		雲見	Kumomi			56.5	2.5	https://zukan.com/gyotaku/leaf109554
Tokyo Bay	T8	8T	Tackles and bait shop	F	石鯛	Ishidai	Oplegnathus fasciatus (Temminck & Schlegel, 1844)	1985-09-12		下田沖横根	Yokone, off Shimoda			56	3.5	https://zukan.com/gyotaku/leaf109555
Tokyo Bay	T9	9T	Tackles and bait shop	F	こち	Kochi	Platycephalus sp. 2	1976-07-08		大貫沖	off Oonuki	上總湊（上総湊） 藤市	Touichi, Kazusaminato	62	1.75	https://zukan.com/gyotaku/leaf109556
Tokyo Bay	T10	10T	Tackles and bait shop	F	皮ハギ	Kawahagi	Stephanolepis cirrhifer (Temminck & Schlegel, 1850)	1987-07-08	15:20:00	久里浜アシカ島から三浦海岸沖，水深30m	30 m, from Ashika Island, Kurihama to off Miura-kaigan	久里浜 山下釣船店	Kurihama, Yamashita Fishing Ship Shop	31	530	https://zukan.com/gyotaku/leaf109557
Tokyo Bay	T11	11T	Tackles and bait shop	F	めじな	Mejina	Girella punctata Gray, 1835	1976-01-14		伊豆大島 公園	Park, Izu-oshima Island			45	1.5	https://zukan.com/gyotaku/leaf109558
Tokyo Bay	T12	12T	Tackles and bait shop	F	野鯉	Nogoi	Cyprinus carpio Linnaeus, 1758	1978-03-13		印旛沼 川鉄水路	Kawatetsu Channel, Lake Imba			69	6	https://zukan.com/gyotaku/leaf109559
Tokyo Bay	T13	13T	Tackles and bait shop	F	鯉	Koi	Cyprinus carpio Linnaeus, 1758	1980-03-30		多摩川 登戸	Noborito, Tama River			75	6.3	https://zukan.com/gyotaku/leaf109560
Tokyo Bay	T14	14T	Tackles and bait shop	F	めじな	Mejina	Girella punctata Gray, 1835	1981-02-06		三宅島	Miyake Island				1.1	https://zukan.com/gyotaku/leaf109561
Tokyo Bay	T14	15T	Tackles and bait shop	F	めじな	Mejina	Girella punctata Gray, 1835	1981-02-06		三宅島	Miyake Island				1.1	https://zukan.com/gyotaku/leaf109561
Tokyo Bay	T14	16T	Tackles and bait shop	F	めじな	Mejina	Girella punctata Gray, 1835	1981-02-06		三宅島	Miyake Island				1.85	https://zukan.com/gyotaku/leaf109561
Tokyo Bay	T15	17T	Tackles and bait shop	F	めじな	Mejina	Girella punctata Gray, 1835	1985-04-14		鴨川 仁衛門島	Niemon Island, Kamogawa			43	1.6	https://zukan.com/gyotaku/leaf109562
Tokyo Bay	T15	18T	Tackles and bait shop	F	めじな	Mejina	Girella punctata Gray, 1835	1985-04-14		鴨川 仁衛門島	Niemon Island, Kamogawa			45	1.8	https://zukan.com/gyotaku/leaf109562
Tokyo Bay	T15	19T	Tackles and bait shop	F	めじな	Mejina	Girella punctata Gray, 1835	1985-04-14		鴨川 仁衛門島	Niemon Island, Kamogawa			37	1.15	https://zukan.com/gyotaku/leaf109562
Tokyo Bay	T16	20T	Tackles and bait shop	F	へら鮒	Herabuna	Carassius cuvieri Temminck & Schlegel, 1846	1990-08-26		小糸川	Koito River			38		https://zukan.com/gyotaku/leaf109563
Tokyo Bay	T17	21T	Tackles and bait shop	F	黒鯛	Kurodai	Acanthopagrus schlegelii (Bleeker, 1854)	1987-04-19		京浜大津	Keihin-ootsu			45	1.18	https://zukan.com/gyotaku/leaf109564
Tokyo Bay	T18	22T	Tackles and bait shop	F	アイナメ	Ainame	Hexagrammos otakii Jordan & Starks, 1895	1989-12-17		横浜 大黒埠頭	Daikoku Pier, Yokohama			41		https://zukan.com/gyotaku/leaf109565
Tokyo Bay	T19	23T	Tackles and bait shop	F	ブラックバス	Black bass	Micropterus salmoides (Lacepède, 1802)	1987-07-19		牛久沼東谷田川	Higashi-yata River, Lake Ushiku			43	1	https://zukan.com/gyotaku/leaf109566
Tokyo Bay	T20	24T	Tackles and bait shop	F	山女魚	Yamame	Oncorhynchus masou masou (Brevoort, 1856)	1989-11-11		群馬県吾妻川水系	Agatsuma River System, Gunma Prefecture			42.4		https://zukan.com/gyotaku/leaf109567
Tokyo Bay	T21	25T	Tackles and bait shop	F	ニジマス	Nijimasu	Oncorhynchus mykiss (Walbaum, 1792)	1993-06-08		芦の湖 白浜	Shirahama, Lake Ashino			62	2.5	https://zukan.com/gyotaku/leaf109568
Tokyo Bay	T22	26T	Tackles and bait shop	F	甘ダイ	Amadai	Branchiostegus sp.	1996-01-07		勝山沖	off Katsuyama			47	1.18	https://zukan.com/gyotaku/leaf109569
Tokyo Bay	T23	27T	Tackles and bait shop	F	石鯛	Ishidai	Oplegnathus fasciatus (Temminck & Schlegel, 1844)	1998-12-06		伊豆大島 高岩（千波崎）	Takaiwa (Senbasaki), Izu-oshima Island			57	3.5	https://zukan.com/gyotaku/leaf109570
Tokyo Bay	T24	28T	Tackles and bait shop	F	ヒラメ	Hirame	Paralichthys olivaceus (Temminck & Schlegel, 1846)	1996-02-04		玉田沖	off Tamada	大洗港 大栄丸	Daieimaru, Ooarai Port	78	5.01	https://zukan.com/gyotaku/leaf109572
Tokyo Bay	T25	29T	Tackles and bait shop	F	へら鮒	Herabuna	Carassius cuvieri Temminck & Schlegel, 1846	1989-04-21		相模湖 国道下	Kokudou-shita, Lake Sagami			42.7		https://zukan.com/gyotaku/leaf109573
Tokyo Bay	T26	30T	Tackles and bait shop	F	B BASS	B Bass	Micropterus salmoides (Lacepède, 1802)	1999-04-17		新利根川上流	The upper stream of the Shin-tone River			48	1.85	https://zukan.com/gyotaku/leaf109574
Tokyo Bay	T27	31T	Tackles and bait shop	F	シロギス	Shirogisu	Sillago japonica Temminck & Schlegel, 1843	1980-01-15		第3海堡西沖（東京湾），水深40m	40 m depth, off west 3rd Kaiho (Tokyo Bay)	安浦港 恒裕丸	Kouyuumaru, Yasuura Port	29.6	0.223	https://zukan.com/gyotaku/leaf109575
Tokyo Bay	T28	32T	Tackles and bait shop	G	カワハギ	Kawahagi	Stephanolepis cirrhifer (Temminck & Schlegel, 1850)	1964-11-08		江ノ島	Enoshima				0.15	https://zukan.com/gyotaku/leaf109654
Tokyo Bay	T29	33T	Tackles and bait shop	G	アイナメ	Ainame	Hexagrammos otakii Jordan & Starks, 1895	1964-12-13		磯子湾，鴨下丸の下手（現在は埋立地）	The below of Kamoshitamaru, Isogo Bay			35.1	0.67	https://zukan.com/gyotaku/leaf109655
Tokyo Bay	T30	34T	Tackles and bait shop	G	縞鯵	Shimaaji	Pseudocaranx dentex (Bloch & Schneider, 1801)	1976-10-15		新島堂丸	Doumaru, Nii-jima Island			71	7.2	https://zukan.com/gyotaku/leaf109656
Tokyo Bay	T31	35T	Tackles and bait shop	G	スズキ	Suzuki	Lateolabrax japonicus (Cuvier, 1828)	1983-12-18		磯子，火力発電所の排水溝の脇	The side of the drain of the thermal power station, Isogo			86	5.3	https://zukan.com/gyotaku/leaf109657
Tokyo Bay	T32	36T	Tackles and bait shop	G	真鯛	Madai	Pagrus major (Temminck & Schlegel, 1844)	1987-11-04		葉山沖	off Hayama	五エム丸	Goemumaru	85	7	https://zukan.com/gyotaku/leaf109658
Tokyo Bay	T33	37T	Tackles and bait shop	G	黒鯛	Kurodai	Acanthopagrus schlegelii (Bleeker, 1854)	1994-08-26		本牧海づり施設（渡り桟橋）	Honmoku Fishing Park (the crossing pier)			53	2.35	https://zukan.com/gyotaku/leaf109659
Tokyo Bay	T34	38T	Tackles and bait shop	G	黒鯛	Kurodai	Acanthopagrus schlegelii (Bleeker, 1854)			東扇島	Higashi-oogishima			51	2.11	https://zukan.com/gyotaku/leaf109660
Tokyo Bay	T35	39T	Tackles and bait shop	G	黒鯛	Kurodai	Acanthopagrus schlegelii (Bleeker, 1854)	1994-09-16		本牧つり公園	Honmoku Fishing Park			54	2.3	https://zukan.com/gyotaku/leaf109661
Tokyo Bay	T36	40T	Tackles and bait shop	G	黒鯛	Kurodai	Acanthopagrus schlegelii (Bleeker, 1854)	1992-06-22		本牧釣り公園	Honmoku Fishing Park			50	1.68	https://zukan.com/gyotaku/leaf109662
Tokyo Bay	T37	41T	Tackles and bait shop	G	黒鯛	Kurodai	Acanthopagrus schlegelii (Bleeker, 1854)	1991-04-20		本牧	Honmoku			45	1.7	https://zukan.com/gyotaku/leaf109663
Tokyo Bay	T38	42T	Tackles and bait shop	G	ナポレオンフィッシュ	Napoleon fish	Cheilinus undulatus Rüppell, 1835	ca. 1975–1980		パラオ，ペリリュー島	Peleliu Island, Palau					https://zukan.com/gyotaku/leaf109664
Tokyo Bay	T39	43T	Tackles and bait shop	G	鱸	Suzuki	Lateolabrax japonicus (Cuvier, 1828)	1999-04-20				長崎屋	Nagasakiya	94	5	https://zukan.com/gyotaku/leaf109665
Tokyo Bay	T40	44T	Tackles and bait shop	G	アイナメ	Ainame	Hexagrammos otakii Jordan & Starks, 1895	1998-01-27	10:00:00	佐久根	Sakune	進丸	Susumumaru	49	1.3	https://zukan.com/gyotaku/leaf109666
Tokyo Bay	T41	45T	Tackles and bait shop	G	真鯒	Magochi	Platycephalus sp. 2	1996-05-06	12:00:00	国府津沖	off Kouzu	第三坂留丸	Daisan-sakatomemaru	64	1.8	https://zukan.com/gyotaku/leaf109667
Tokyo Bay	T42	46T	Tackles and bait shop	G	真鯛	Madai	Pagrus major (Temminck & Schlegel, 1844)	1987-10-05		葉山沖	off Hayama	五エム丸	Goemumaru	85	8.6	https://zukan.com/gyotaku/leaf109668
Tokyo Bay	T43	47T	Tackles and bait shop	G												https://zukan.com/gyotaku/leaf109669
Tokyo Bay	T43	48T	Tackles and bait shop	G												https://zukan.com/gyotaku/leaf109669
Tokyo Bay	T44	49T	Tackles and bait shop	G	黒鯛	Kurodai	Acanthopagrus schlegelii (Bleeker, 1854)	2012-08-10		横浜沖堤四畳半	Yojouhan Breakwater, off Yokohama	渡辺釣船店	Watanabe-tsuribuneten	53.5	2.9	https://zukan.com/gyotaku/leaf109670
Tokyo Bay	T45	50T	Tackles and bait shop	G	黒鯛	Kurodai	Acanthopagrus schlegelii (Bleeker, 1854)	2004-09-12		大黒埠頭	Daikoku Pier			55	2.6	https://zukan.com/gyotaku/leaf109671
Tokyo Bay	T46	51T	Tackles and bait shop	G	黒鯛	Kurodai	Acanthopagrus schlegelii (Bleeker, 1854)	2000-04-02		富岡	Tomioka			51.1	2.76	https://zukan.com/gyotaku/leaf109672
Tokyo Bay	T47	52T	Tackles and bait shop	G	かわはぎ	Kawahagi	Stephanolepis cirrhifer (Temminck & Schlegel, 1850)	2017-11-01		久里浜沖	off Kurihama	久比里 山下丸	Yamashitamaru, Kubiri	33	0.805	https://zukan.com/gyotaku/leaf109673
Tokyo Bay	T48	53T	Tackles and bait shop	G	黒鯛	Kurodai	Acanthopagrus schlegelii (Bleeker, 1854)	2011-06-08		鳥浜	Torihama			50.5	2.15	https://zukan.com/gyotaku/leaf109674
Tokyo Bay	T49	54T	Tackles and bait shop	G	黒鯛	Kurodai	Acanthopagrus schlegelii (Bleeker, 1854)	2008-03-22		鳥浜	Torihama			57	3.15	https://zukan.com/gyotaku/leaf109675
Tokyo Bay	T50	55T	Ship shop	I				2010-07-11		扇島	Oogishima	隠居屋	Inkyo-ya	43	1	https://zukan.com/gyotaku/leaf109576
Tokyo Bay	T51	56T	Ship shop	I				2013-07-14		扇島	Oogishima	隠居屋	Inkyo-ya	29		https://zukan.com/gyotaku/leaf109577
Tokyo Bay	T52	57T	Ship shop	I				2012-07-27		大貫沖	off Oonuki	隠居屋	Inkyo-ya		3.4	https://zukan.com/gyotaku/leaf109578
Tokyo Bay	T53	58T	Ship shop	I				2009-05-05		富岡	Tomioka	隠居屋	Inkyo-ya	43		https://zukan.com/gyotaku/leaf109579
Tokyo Bay	T54	59T	Ship shop	I				2016-09-11		横浜沖	off Yokohama	隠居屋	Inkyo-ya		4.5	https://zukan.com/gyotaku/leaf109580
Tokyo Bay	T55	60T	Ship shop	I				2012-01-04		富岡沖	off Tomioka	隠居屋	Inkyo-ya	44		https://zukan.com/gyotaku/leaf109581
Tokyo Bay	T56	61T	Ship shop	I				2012-01-07		根岸湾	Negishi Bay	隠居屋	Inkyo-ya	41		https://zukan.com/gyotaku/leaf109583
Tokyo Bay	T57	62T	Ship shop	I				2013-08-15		大貫沖	off Oonuki	隠居屋	Inkyo-ya		4.2	https://zukan.com/gyotaku/leaf109584
Tokyo Bay	T58	63T	Ship shop	I				2017-06-10		扇島	Oogishima	隠居屋	Inkyo-ya	33		https://zukan.com/gyotaku/leaf109585
Tokyo Bay	T59	64T	Ship shop	I				2012-04-30				隠居屋	Inkyo-ya	33		https://zukan.com/gyotaku/leaf109586
Tokyo Bay	T60	65T	Ship shop	I				2012-07-22		大貫沖	off Oonuki	隠居屋	Inkyo-ya		4.5	https://zukan.com/gyotaku/leaf109588
Tokyo Bay	T61	66T	Ship shop	I				2007-02-20		扇島	Oogishima	隠居屋	Inkyo-ya	48	1.2	https://zukan.com/gyotaku/leaf109589
Tokyo Bay	T62	67T	Ship shop	I				2018-10-28				隠居屋	Inkyo-ya	50		https://zukan.com/gyotaku/leaf109590
Tokyo Bay	T63	68T	Ship shop	I				2013-01-04		富岡沖	off Tomioka	隠居屋	Inkyo-ya	37		https://zukan.com/gyotaku/leaf109591
Tokyo Bay	T64	69T	Ship shop	I				2007-03-04		横浜沖	off Yokohama	隠居屋	Inkyo-ya	43		https://zukan.com/gyotaku/leaf109592
Tokyo Bay	T65	70T	Ship shop	I				2017-04-09				隠居屋	Inkyo-ya	31		https://zukan.com/gyotaku/leaf109593
Tokyo Bay	T65	71T	Ship shop	I				2017-04-09				隠居屋	Inkyo-ya	30		https://zukan.com/gyotaku/leaf109593
Tokyo Bay	T66	72T	Ship shop	I				2006-01-05		本牧沖	off Honmoku	隠居屋	Inkyo-ya	40		https://zukan.com/gyotaku/leaf109594
Tokyo Bay	T67	73T	Ship shop	I				2017-06-04		横浜沖	off Yokohama	隠居屋	Inkyo-ya		7	https://zukan.com/gyotaku/leaf109595
Tokyo Bay	T68	74T	Ship shop	I				2014-06-01		大貫沖	off Oonuki	隠居屋	Inkyo-ya		4.3	https://zukan.com/gyotaku/leaf109596
Tokyo Bay	T69	75T	Ship shop	I	ヒラメ	Hirame	Paralichthys olivaceus (Temminck & Schlegel, 1846)	2014-11-01		中ノ瀬	Nakanose	隠居屋	Inkyo-ya	50	2	https://zukan.com/gyotaku/leaf109597
Tokyo Bay	T70	76T	Ship shop	I				2006-01-04				隠居屋	Inkyo-ya	45		https://zukan.com/gyotaku/leaf109598
Tokyo Bay	T71	77T	Ship shop	I				2007-01-28				隠居屋	Inkyo-ya	43		https://zukan.com/gyotaku/leaf109599
Tokyo Bay	T72	78T	Ship shop	I	アイナメ	Ainame	Hexagrammos otakii Jordan & Starks, 1895	2007-02-19		扇島沖	off Oogishima	隠居屋	Inkyo-ya	46		https://zukan.com/gyotaku/leaf109600
Tokyo Bay	T73	79T	Ship shop	I				2011-10-10				隠居屋	Inkyo-ya	30.5		https://zukan.com/gyotaku/leaf109601
Tokyo Bay	T74	80T	Ship shop	I				2014-08-02		扇島	Oogishima	隠居屋	Inkyo-ya	31		https://zukan.com/gyotaku/leaf109602
Tokyo Bay	T75	81T	Ship shop	I	メバル	Mebaru	Sebastes cf. cheni Barsukov, 1988	2014-03-09		横浜沖	off Yokohama	隠居屋	Inkyo-ya	29.5		https://zukan.com/gyotaku/leaf109603
Tokyo Bay	T75	82T	Ship shop	I	カサゴ	Kasago	Sebastiscus marmoratus (Cuvier, 1829)	2014-03-09		横浜沖	off Yokohama	隠居屋	Inkyo-ya	31		https://zukan.com/gyotaku/leaf109603
Tokyo Bay	T76	83T	Ship shop	I				2006-09-17				隠居屋	Inkyo-ya	29.5		https://zukan.com/gyotaku/leaf109604
Tokyo Bay	T77	84T	Ship shop	I				2010-04-11		中ノ瀬	Nakanose	隠居屋	Inkyo-ya	40		https://zukan.com/gyotaku/leaf109605
Tokyo Bay	T78	85T	Ship shop	I				2017-06-04		横浜沖	off Yokohama	隠居屋	Inkyo-ya		5	https://zukan.com/gyotaku/leaf109606
Tokyo Bay	T79	86T	Ship shop	I				2017-06-03		横浜沖	off Yokohama	隠居屋	Inkyo-ya		5.2	https://zukan.com/gyotaku/leaf109607
Tokyo Bay	T80	87T	Ship shop	I				2013-06-09		大貫沖	off Oonuki	隠居屋	Inkyo-ya		5.3	https://zukan.com/gyotaku/leaf109608
Tokyo Bay	T81	88T	Ship shop	I				2013-06-01				隠居屋	Inkyo-ya		4.7	https://zukan.com/gyotaku/leaf109609
Tokyo Bay	T82	89T	Ship shop	I				2013-07-05		富岡沖	off Tomioka	隠居屋	Inkyo-ya		4.1	https://zukan.com/gyotaku/leaf109610
Tokyo Bay	T83	90T	Ship shop	I				2016-03-20		中ノ瀬	Nakanose	隠居屋	Inkyo-ya	45		https://zukan.com/gyotaku/leaf109611
Tokyo Bay	T84	91T	Ship shop	I				2017-06-04		横浜沖	off Yokohama	隠居屋	Inkyo-ya		4.8	https://zukan.com/gyotaku/leaf109612
Tokyo Bay	T85	92T	Ship shop	I	スズキ	Suzuki	Lateolabrax japonicus (Cuvier, 1828)	2008-01-19		鶴見橋	Tsurumi Bridge	隠居屋	Inkyo-ya	64	2.5	https://zukan.com/gyotaku/leaf109613
Tokyo Bay	T86	93T	Ship shop	I				2012-06-08		大貫沖	off Oonuki	隠居屋	Inkyo-ya		3.5	https://zukan.com/gyotaku/leaf109614
Tokyo Bay	T87	94T	Ship shop	I				1999-12-22		第二海堡	2nd Kaiho	隠居屋	Inkyo-ya		4.2	https://zukan.com/gyotaku/leaf109615
Tokyo Bay	T88	95T	Ship shop	I				1999-07-02		海堡	Kaiho	隠居屋	Inkyo-ya		4.5	https://zukan.com/gyotaku/leaf109616
Tokyo Bay	T89	96T	Tackles and bait shop	H	真鯛	Madai	Pagrus major (Temminck & Schlegel, 1844)	2015-03-01				大原港 春日丸	Kasugamaru, Oohara Port	88	8.5	https://zukan.com/gyotaku/leaf109415
Tokyo Bay	T90	97T	Tackles and bait shop	H	障泥烏賊	Aoriika	Sepioteuthis lessoniana Férussac, 1831	2018-05-05		南房総市白浜	Shirahama, Minami-bousou City			35	2	https://zukan.com/gyotaku/leaf109416
Tokyo Bay	T91	98T	Tackles and bait shop	H	大鮸	Oonibe	Argyrosomus japonicus (Temminck & Schlegel, 1844)	2017-01-02		宮崎県日向灘	Hyuuga Sea, Miyazaki Prefecture			114	12.64	https://zukan.com/gyotaku/leaf109417
Tokyo Bay	T92	99T	Tackles and bait shop	H	平政	Hiramasa	Seriola lalandi Valenciennes, 1833	2014-10-20		千葉県外房	Sotobou, Chiba Prefecture	川津港 宏昌丸	Kosyo-maru, Kawazu Port	163	30.24	https://zukan.com/gyotaku/leaf109418
Tokyo Bay	T93	100T	Tackles and bait shop	H	𩺊	Ara	Epinephelus cf. bruneus Bloch, 1793	2018-09-23		千葉県勝浦沖	off Katsuura, Chiba Prefecture			82	8	https://zukan.com/gyotaku/leaf109419
Tokyo Bay	T94	101T	Tackles and bait shop	H	平政	Hiramasa	Seriola lalandi Valenciennes, 1833	2014-11-25		大原沖	off Oohara	大原港 山正丸	Yamashomaru, Oohara Port	162.5	36.8	https://zukan.com/gyotaku/leaf109420
Tokyo Bay	T95	102T	Tackles and bait shop	H	皮剥	Kawahagi	Stephanolepis cirrhifer (Temminck & Schlegel, 1850)	2018-07-22		竹岡沖	off Takeoka	久比里 山下丸	Yamashitamaru, Kubiri	30.2		https://zukan.com/gyotaku/leaf109421
Tokyo Bay	T96	103T	Tackles and bait shop	H	マゴチ	Magochi	Platycephalus sp. 2	2011-03-20		大貫沖	off Oonuki	第12いわた丸	12th Iwatamaru	71	2.6	https://zukan.com/gyotaku/leaf109422
Tokyo Bay	T97	104T	Tackles and bait shop	H				ca. 2014		伊豆大島	Izu-oshima Island					https://zukan.com/gyotaku/leaf109423
Tokyo Bay	T98	105T	Ship shop	J	青ギス	Aogisu	Sillago parvisquamis Gill, 1861	1936-06-29		八郎兵エ	Hachirobee	船宿 吉野屋	Funayado-yoshinoya	40.9	0.4875	https://zukan.com/gyotaku/leaf83582
Tokyo Bay	T99	106T	Ship shop	J				1963-07-14		大角	Oosumi	船宿 吉野屋	Funayado-yoshinoya	33.3		https://zukan.com/gyotaku/leaf83583
Tokyo Bay	T100	107T	Ship shop	J				1956-06-13				船宿 吉野屋	Funayado-yoshinoya	32.7		https://zukan.com/gyotaku/leaf109313
Tokyo Bay	T101	108T	Ship shop	J				1954-05-16				船宿 吉野屋	Funayado-yoshinoya	32.7		https://zukan.com/gyotaku/leaf109314
Tokyo Bay	T102	109T	Ship shop	J								船宿 吉野屋	Funayado-yoshinoya			https://zukan.com/gyotaku/leaf109318
Tokyo Bay	T103	110T	Ship shop	J								船宿 吉野屋	Funayado-yoshinoya			https://zukan.com/gyotaku/leaf109319
Tokyo Bay	T104	111T	Ship shop	J								船宿 吉野屋	Funayado-yoshinoya			https://zukan.com/gyotaku/leaf109320
Tokyo Bay	T104	112T	Ship shop	J								船宿 吉野屋	Funayado-yoshinoya			https://zukan.com/gyotaku/leaf109320
Tokyo Bay	T104	113T	Ship shop	J								船宿 吉野屋	Funayado-yoshinoya			https://zukan.com/gyotaku/leaf109320
Tokyo Bay	T104	114T	Ship shop	J								船宿 吉野屋	Funayado-yoshinoya			https://zukan.com/gyotaku/leaf109320
Tokyo Bay	T104	115T	Ship shop	J								船宿 吉野屋	Funayado-yoshinoya			https://zukan.com/gyotaku/leaf109320
Tokyo Bay	T104	116T	Ship shop	J								船宿 吉野屋	Funayado-yoshinoya			https://zukan.com/gyotaku/leaf109320
Tokyo Bay	T105	117T	Ship shop	J								船宿 吉野屋	Funayado-yoshinoya			https://zukan.com/gyotaku/leaf109321
Tokyo Bay	T105	118T	Ship shop	J								船宿 吉野屋	Funayado-yoshinoya			https://zukan.com/gyotaku/leaf109321
Tokyo Bay	T106	119T	Ship shop	J								船宿 吉野屋	Funayado-yoshinoya			https://zukan.com/gyotaku/leaf109322
Miyazaki	M1	1M	Tackles and bait shop	K	黒鯛	Kurodai	Acanthopagrus schlegelii (Bleeker, 1854)	1992-12-20		一ツ瀬川 杉山下	Under Sugiyama, Hitotsuse River			56	3.35	https://zukan.com/gyotaku/leaf83565
Miyazaki	M2	2M	Tackles and bait shop	K	まるか（赤目）	Maruka (Akame)	Lates japonicus Katayama & Taki, 1984	2001-10-29		一ツ瀬川 二ツ立水門前	In front of the Futatsutate water gate, Hitotsuse River			90	11	https://zukan.com/gyotaku/leaf83558
Miyazaki	M3	3M	Tackles and bait shop	K	胡椒鯛	Koshoudai	Plectorhinchus cinctus (Temminck & Schlegel, 1843)	2002-08-03		千本杭	Senbongui			56	2.8	https://zukan.com/gyotaku/leaf83559
Miyazaki	M4	4M	Tackles and bait shop	K	スズキ	Suzuki	Lateolabrax cf. latus Katayama, 1957	1992-01-28		二ツ立水門	Futatsutate water gate			92	6.5	https://zukan.com/gyotaku/leaf83563
Miyazaki	M5	5M	Tackles and bait shop	K	黒鯛	Kurodai	Acanthopagrus schlegelii (Bleeker, 1854)	2002-05-31		一ツ瀬鉄橋下	Under the iron bridge, Hitotsuse			48	1.7	https://zukan.com/gyotaku/leaf83560
Miyazaki	M6	6M	Tackles and bait shop	K	黒鯛	Kurodai	Acanthopagrus schlegelii (Bleeker, 1854)	1997-06-22		一ツ瀬川河口	The mouth of the Hitotsuse River			51	2.05	https://zukan.com/gyotaku/leaf83561
Miyazaki	M7	7M	Tackles and bait shop	K	黒鯛	Kurodai	Acanthopagrus schlegelii (Bleeker, 1854)	2008-04-12		一ツ瀬川 杉山前	In front of the Sugiyama, Hitotsuse River			50	2.12	https://zukan.com/gyotaku/leaf83567
Miyazaki	M8	8M	Tackles and bait shop	K	チヌ	Chinu	Acanthopagrus schlegelii (Bleeker, 1854)	1982-07-11						53	2.6	https://zukan.com/gyotaku/leaf83562
Miyazaki	M9	9M	Tackles and bait shop	K	スズキ	Suzuki	Lateolabrax japonicus (Cuvier, 1828)			一ツ瀬川 万望食堂下	Under the Banbou Restaurant, Hitotsuse River			86	5.5	https://zukan.com/gyotaku/leaf83564
Miyazaki	M10	10M	Tackles and bait shop	K	黒鯛	Kurodai	Acanthopagrus schlegelii (Bleeker, 1854)	2002-07-07		一ツ瀬川	Hitotsuse River			56	3	https://zukan.com/gyotaku/leaf83566
Miyazaki	M11	11M	Tackles and bait shop	K	鱸（スヾキ）	Suzuki	Lateolabrax japonicus (Cuvier, 1828)	2002-05-22		石崎川	Ishizaki River			90	5.4	https://zukan.com/gyotaku/leaf109283
Miyazaki	M12	12M	Tackles and bait shop	K	平目	Hirame	Paralichthys olivaceus (Temminck & Schlegel, 1846)	1994-05-29		一ツ瀬川河口	The mouth of the Hitotsuse River			78	5	https://zukan.com/gyotaku/leaf109285
Miyazaki	M13	13M	Tackles and bait shop	L				1994-10-30		日向大橋下	Under the Hyuga-ohashi Bridge			85	5.5	https://zukan.com/gyotaku/leaf83580
Miyazaki	M14	14M	Tackles and bait shop	L	スズキ	Suzuki	Lateolabrax japonicus (Cuvier, 1828)	2000-01-18		一ツ瀬川	Hitotsuse River			74	2.8	https://zukan.com/gyotaku/leaf83574
Miyazaki	M15	15M	Tackles and bait shop	L	スズキ	Suzuki	Lateolabrax japonicus (Cuvier, 1828)	1993-12-16		万望前	In front of the Banbou			73	4	https://zukan.com/gyotaku/leaf83579
Miyazaki	M16	16M	Tackles and bait shop	L	キビレ	Kibire	Acanthopagrus latus (Houttuyn, 1782)	1998-10-16		富田漁港	Tomita Fishing Port					https://zukan.com/gyotaku/leaf83575
Miyazaki	M17	17M	Tackles and bait shop	L	チヌ（キビレ）	Chinu (Kibire)	Acanthopagrus latus (Houttuyn, 1782)			（一ツ瀬川上流）	The upper stream of the Hitotsuse River				1.3	https://zukan.com/gyotaku/leaf83577
Miyazaki	M18	18M	Tackles and bait shop	L	アカメ	Akame	Lates japonicus Katayama & Taki, 1984	1998-11-04						53	1.63	https://zukan.com/gyotaku/leaf83576
Miyazaki	M19	19M	Tackles and bait shop	L				1990-12-30		千本	Senbon			83	5.3	https://zukan.com/gyotaku/leaf83578
Miyazaki	M20	20M	Tackles and bait shop	L	スズキ	Suzuki	Lates japonicus Katayama & Taki, 1984	1990-12-15		一ツ瀬川	Hitotsuse River			83	4.3	https://zukan.com/gyotaku/leaf83581
Miyazaki	M21	21M	Tackles and bait shop	M	アカメ	Akame	Lates japonicus Katayama & Taki, 1984	1999-10-24	22:00:00	小丸川河口	The mouth of the Komaru River				30	https://zukan.com/gyotaku/leaf83568
Miyazaki	M22	22M	Tackles and bait shop	M	尾長グレ	Onagagure	Girella leonina (Richardson, 1846)	1997-05-04		硫黄島	Iou-jima Island			60.5	3.55	https://zukan.com/gyotaku/leaf83569
Miyazaki	M23	23M	Tackles and bait shop	M	ニベ	Nibe	Argyrosomus japonicus (Temminck & Schlegel, 1844)			永谷浜	Nagatani-hama Beach			130	20.6	https://zukan.com/gyotaku/leaf83571
Miyazaki	M24	24M	Tackles and bait shop	M	クチジロ	Kuchijiro	Oplegnathus punctatus (Temminck & Schlegel, 1844)	2005-04-12		沖のオサン瀬	Oki-no-osanse			81	10.2	https://zukan.com/gyotaku/leaf83570
Miyazaki	M25	25M	Tackles and bait shop	M	山女魚	Yamame	Oncorhynchus masou masou (Brevoort, 1856)	2003-05-04		五ヶ瀬川	Gokase River			33		https://zukan.com/gyotaku/leaf83573
Miyazaki	M26	26M	Tackles and bait shop	M	尾長	Onaga	Girella leonina (Richardson, 1846)	2009-11-21		甑島 弁慶 二番半	Niban-han (2nd-half) of Benkei, Koshiki-jima Island			60.1	3.94	https://zukan.com/gyotaku/leaf83572
Yaeyama	Y1	1Y	Tackles and bait shop	O	シチュー（てんじくいさき）	Shichū (Tenjikuisaki)	Kyphosus cinerascens (Forsskål, 1775)	1995-09-12	23:00:00	八島町東	East of Yashima Town			51	2.9	https://zukan.com/gyotaku/leaf83123
Yaeyama	Y2	2Y	Tackles and bait shop	O	ガーラ	Gāra	Caranx sp.	1995-10-05	06:30:00	伊野田漁港	Inoda Fishing Port			69	ca. 3.5	https://zukan.com/gyotaku/leaf83125
Yaeyama	Y3	3Y	Tackles and bait shop	O	ガーラ	Gāra	Caranx sp.	July, 1996		フサキビーチ	Fusaki Beach			70	3.8	https://zukan.com/gyotaku/leaf83126
Yaeyama	Y4	4Y	Tackles and bait shop	O	カーエー	Kāē	Siganus guttatus (Bloch, 1787)	1996-07-07	00:30:00	八島小学校東	East of the Yashima Elementary School			45	2.2	https://zukan.com/gyotaku/leaf83124
Yaeyama	Y5	5Y	Tackles and bait shop	O	チヌ	Chinu	Acanthopagrus sivicolus Akazaki, 1962	1996-02-23	03:00:00	新川漁港	Arakawa Fishing Port			48	2.2	https://zukan.com/gyotaku/leaf83130
Yaeyama	Y6	6Y	Tackles and bait shop	O	アカジンミーバイ	Akajinmībai	Plectropomus leopardus (Lacepède, 1802)	1996-03-17		カヤマ島北沖	off north Kayama Island			60	3.1	https://zukan.com/gyotaku/leaf83129
Yaeyama	Y7	7Y	Tackles and bait shop	O	カーエー	Kāē	Siganus guttatus (Bloch, 1787)	1996-09-30	P.M.	登野城漁港	Tonoki Fishing Port			51	2.7	https://zukan.com/gyotaku/leaf83128
Yaeyama	Y8	8Y	Tackles and bait shop	O	タマン（浜フエフキダイ）	Taman (Hamafuefukidai)	Lethrinus nebulosus (Forsskål, 1775)	1994-05-25		伊原間東海岸	East coast of the Ibaruma			58	2.6	https://zukan.com/gyotaku/leaf83127
Yaeyama	Y9	9Y	Tackles and bait shop	N	ロウニンアジ	Rouninaji	Caranx ignobilis (Forsskål, 1775)	2009-12-10		サザンゲート	Southern Gate			125	23	https://zukan.com/gyotaku/leaf83131
Yaeyama	Y10	10Y	Tackles and bait shop	N	ロウニンアジ	Rouninaji	Caranx ignobilis (Forsskål, 1775)	2010-06-23		西表上原港	Uehara Port, Iriomote			126	25.8	https://zukan.com/gyotaku/leaf83132
Yaeyama	Y11	11Y	Tackles and bait shop	N	浪人鯵（ロウニンアジ）	Rouninaji	Caranx ignobilis (Forsskål, 1775)	2016-09-23		西表上原	Uehara, Iriomote			113	20	https://zukan.com/gyotaku/leaf83133
Yaeyama	Y11	11B	Tackles and bait shop	N	浪人鯵（ロウニンアジ）	Rouninaji	Caranx ignobilis (Forsskål, 1775)	2016-09-23		西表上原	Uehara, Iriomote			126	29	https://zukan.com/gyotaku/leaf83133
Yaeyama	Y12	12Y	Tackles and bait shop	N	ガーラ（ロウニンアジ）	Gāra (Rouninaji)	Caranx ignobilis (Forsskål, 1775)	2016-07-06		八島町東	East of the Yashima Town			105	17	https://zukan.com/gyotaku/leaf109954
Yaeyama	Y13	13Y	Tackles and bait shop	N	タマン（ハマフエフキ）	Taman (Hamafuefuki)	Lethrinus nebulosus (Forsskål, 1775)	2015-10-28		フサキ	Fusaki			60	2.4	https://zukan.com/gyotaku/leaf109955
Yaeyama	Y14	13Y	Tackles and bait shop	N	タマン（ハマフエフキ）	Taman (Hamafuefuki)	Lethrinus nebulosus (Forsskål, 1775)	2015-10-28		フサキ	Fusaki			60	2.4	https://zukan.com/gyotaku/leaf109956
Yaeyama	Y15	14Y	Tackles and bait shop	N	アオリイカ（障泥烏賊）	Aoriika	Sepioteuthis lessoniana Férussac, 1831	2016-04-10		西表祖納港	Sonai Port, Iriomote				1.8	https://zukan.com/gyotaku/leaf109957
Yaeyama	Y16	15Y	Tackles and bait shop	N	クブシミ（甲烏賊）	Kushibumi (Kouika)	Sepia latimanus Quoy & Gaimard, 1832	2016-03-05		観音堂	Kannondo (the temple dedicated to Kannon)				3.115	https://zukan.com/gyotaku/leaf109958
Yaeyama	Y17	16Y	Tackles and bait shop	N	あおりいか	Aoriika	Sepioteuthis lessoniana Férussac, 1831	2011-04-21							2.35	https://zukan.com/gyotaku/leaf83134
Yaeyama	Y18	17Y	Tackles and bait shop	N	煽烏賊	Aoriika	Sepioteuthis lessoniana Férussac, 1831	2013-05-09		チービシ沖	off Chībishi				4	https://zukan.com/gyotaku/leaf83135
Yaeyama	Y19	18Y	Tackles and bait shop	P	カンパチ	Kanpachi	Seriola dumerili (Risso, 1810)	2003-02-16		平久保沖	off Hirakubo				20	https://zukan.com/gyotaku/leaf83136
Yaeyama	Y20	19Y	Tackles and bait shop	P	カマジャー（ロウニンアジ）	Kamajā	Caranx ignobilis (Forsskål, 1775)	1985-11-18	19:20:00	波照間高那	Takana, Hateruma				39	https://zukan.com/gyotaku/leaf83137
Yaeyama	Y21	20Y	Tackles and bait shop	P												https://zukan.com/gyotaku/leaf83140
Yaeyama	Y21	21Y	Tackles and bait shop	P												https://zukan.com/gyotaku/leaf83140
Yaeyama	Y21	22Y	Tackles and bait shop	P												https://zukan.com/gyotaku/leaf83140
Yaeyama	Y21	23Y	Tackles and bait shop	P				1983-03-31						40.5	1.3	https://zukan.com/gyotaku/leaf83140
Yaeyama	Y21	24Y	Tackles and bait shop	P				1983-03-31						37	0.93	https://zukan.com/gyotaku/leaf83140
Yaeyama	Y21	25Y	Tackles and bait shop	P				1983-04-07	19:50:00					38	1.22	https://zukan.com/gyotaku/leaf83140
Yaeyama	Y21	26Y	Tackles and bait shop	P				1983-04-07	21:10:00					40.5	1.48	https://zukan.com/gyotaku/leaf83140
Yaeyama	Y21	27Y	Tackles and bait shop	P				1983-04-07	22:22:00					37	1	https://zukan.com/gyotaku/leaf83140
Yaeyama	Y21	28Y	Tackles and bait shop	P					20:40:00							https://zukan.com/gyotaku/leaf83140
Yaeyama	Y21	29Y	Tackles and bait shop	P												https://zukan.com/gyotaku/leaf83140
Yaeyama	Y21	30Y	Tackles and bait shop	P				1983-04-20	20:30:00							https://zukan.com/gyotaku/leaf83140
Yaeyama	Y22	31Y	Tackles and bait shop	P				December 9	07:15:00					58	0.95	https://zukan.com/gyotaku/leaf83139
Yaeyama	Y22	32Y	Tackles and bait shop	P					07:20:00					57	0.9	https://zukan.com/gyotaku/leaf83139
Yaeyama	Y22	33Y	Tackles and bait shop	P				1981-01-11	07:25:00					31	0.5	https://zukan.com/gyotaku/leaf83139
Yaeyama	Y22	34Y	Tackles and bait shop	P	チヌ	Chinu	Acanthopagrus sivicolus Akazaki, 1962	1981-02-14	08:15:00	新栄町舟付場	The harbor of the Shin-ei Town			46	1.95	https://zukan.com/gyotaku/leaf83139
Yaeyama	Y22	35Y	Tackles and bait shop	P	カーエ	Kāe	Siganus guttatus (Bloch, 1787)	1981-02-05	21:00:00					39	1.05	https://zukan.com/gyotaku/leaf83139
Yaeyama	Y22	36Y	Tackles and bait shop	P	カーエ	Kāe	Siganus guttatus (Bloch, 1787)		21:25:00					34	0.8	https://zukan.com/gyotaku/leaf83139
Yaeyama	Y22	37Y	Tackles and bait shop	P				1982-03-27	06:21:00	浜崎町	Hamasaki Town			38	0.6	https://zukan.com/gyotaku/leaf83139
Yaeyama	Y22	38Y	Tackles and bait shop	P					06:32:00	浜崎町	Hamasaki Town			36	0.6	https://zukan.com/gyotaku/leaf83139
Yaeyama	Y22	39Y	Tackles and bait shop	P				1982-03-27	06:40:00	浜崎町	Hamasaki Town			65	1.2	https://zukan.com/gyotaku/leaf83139
Yaeyama	Y22	40Y	Tackles and bait shop	P				1982-03-28	06:28:00	浜崎町	Hamasaki Town			41	0.9	https://zukan.com/gyotaku/leaf83139
Yaeyama	Y22	41Y	Tackles and bait shop	P					06:33:00	浜崎町	Hamasaki Town			35	0.6	https://zukan.com/gyotaku/leaf83139
Yaeyama	Y22	42Y	Tackles and bait shop	P												https://zukan.com/gyotaku/leaf83139
Yaeyama	Y22	43Y	Tackles and bait shop	P	タチウオ	Tachiuo	Trichiurus sp.		06:20:00					58		https://zukan.com/gyotaku/leaf83139
Yaeyama	Y22	44Y	Tackles and bait shop	P				1982-04-03	06:30:00	浜崎町	Hamasaki Town			34.5	0.5	https://zukan.com/gyotaku/leaf83139
Yaeyama	Y22	45Y	Tackles and bait shop	P				1982-12-09	22:30:00	石垣港	Ishigaki Port			38		https://zukan.com/gyotaku/leaf83139
Yaeyama	Y22	46Y	Tackles and bait shop	P												https://zukan.com/gyotaku/leaf83139
Yaeyama	Y23	47Y	Tackles and bait shop	P												https://zukan.com/gyotaku/leaf83141
Yaeyama	Y23	48Y	Tackles and bait shop	P												https://zukan.com/gyotaku/leaf83141
Yaeyama	Y23	49Y	Tackles and bait shop	P												https://zukan.com/gyotaku/leaf83141
Yaeyama	Y23	50Y	Tackles and bait shop	P												https://zukan.com/gyotaku/leaf83141
Yaeyama	Y23	51Y	Tackles and bait shop	P												https://zukan.com/gyotaku/leaf83141
Yaeyama	Y23	52Y	Tackles and bait shop	P												https://zukan.com/gyotaku/leaf83141
Yaeyama	Y23	53Y	Tackles and bait shop	P												https://zukan.com/gyotaku/leaf83141
Yaeyama	Y23	54Y	Tackles and bait shop	P												https://zukan.com/gyotaku/leaf83141
Yaeyama	Y23	55Y	Tackles and bait shop	P												https://zukan.com/gyotaku/leaf83141
Yaeyama	Y23	56Y	Tackles and bait shop	P												https://zukan.com/gyotaku/leaf83141
Yaeyama	Y23	57Y	Tackles and bait shop	P												https://zukan.com/gyotaku/leaf83141
Yaeyama	Y23	58Y	Tackles and bait shop	P												https://zukan.com/gyotaku/leaf83141
Yaeyama	Y23	59Y	Tackles and bait shop	P												https://zukan.com/gyotaku/leaf83141
Yaeyama	Y24	60Y	Tackles and bait shop	P				1987-01-21		西波照間				48.5	2	https://zukan.com/gyotaku/leaf83142
Yaeyama	Y24	61Y	Tackles and bait shop	P												https://zukan.com/gyotaku/leaf83142
Yaeyama	Y24	62Y	Tackles and bait shop	P												https://zukan.com/gyotaku/leaf83142
Yaeyama	Y24	63Y	Tackles and bait shop	P												https://zukan.com/gyotaku/leaf83142
Yaeyama	Y25	64Y	Tackles and bait shop	P				2003-02-23		川平石崎沖	沖縄県石垣市川平				32	https://zukan.com/gyotaku/leaf83143
Yaeyama	Y26	65Y	Tackles and bait shop	P	バレン（バショウカジキ）	Baren (Bashoukajiki)	Istiophorus platypterus (Shaw & Nodder, 1792)	2001-06-09		野原	沖縄県石垣市桃里				52	https://zukan.com/gyotaku/leaf83144
Yaeyama	Y27	66Y	Tackles and bait shop	P	ロウニンアジ	Rouninaji	Caranx ignobilis (Forsskål, 1775)	1991-06-16	21:15:00	港湾ターミナル前	沖縄県石垣市浜崎町			128	30	https://zukan.com/gyotaku/leaf83145
Yaeyama	Y28	67Y	Tackles and bait shop	P										112	16	https://zukan.com/gyotaku/leaf83146
Yaeyama	Y29	68Y	Tackles and bait shop	P	ロウニンアジ（カマジャー）	Rouninaji (Kamajā)	Caranx ignobilis (Forsskål, 1775)	1990-07-01	18:40:00	登野城漁港	沖縄県石垣市八島町				30	https://zukan.com/gyotaku/leaf83147
Yaeyama	Y30	69Y	Tackles and bait shop	P	タマン	Taman	Lethrinus nebulosus (Forsskål, 1775)	1997-12-01	03:00:00					70	5.5	https://zukan.com/gyotaku/leaf83148
Yaeyama	Y31	70Y	Tackles and bait shop	P	キハダマグロ（チンバニー）	Kihadamaguro (Chinbanī)	Thunnus albacares (Bonnaterre, 1788)	1986-08-08	07:40:00	川平石崎沖	沖縄県石垣市川平			115	23	https://zukan.com/gyotaku/leaf83149
Yaeyama	Y32	71Y	Tackles and bait shop	P	ガーラ（カスミアジ）	Gāra (Kasumiaji)	Caranx melampygus Cuvier, 1833	1990-07-20	8:45–9:00	登野城漁港	沖縄県石垣市八島町			117	21	https://zukan.com/gyotaku/leaf83150
Yaeyama	Y33	72Y	Tackles and bait shop	P	ロウニンアジ（カーラ）	Rouninaji (Gāra)	Caranx ignobilis (Forsskål, 1775)	1992-04-14	A.M.	竹富東	沖縄県八重山郡竹富町字竹富			123	23	https://zukan.com/gyotaku/leaf83151
Yaeyama	Y34	73Y	Tackles and bait shop	P	ロウニンアジ	Rouninaji	Caranx ignobilis (Forsskål, 1775)	1989-04-17	17:00:00	平久保	沖縄県石垣市平久保			115	22.4	https://zukan.com/gyotaku/leaf83152
Yaeyama	Y35	74Y	Tackles and bait shop	P	ロウニンアジ（カマジャー）	Rouninaji (Kamajā)	Caranx ignobilis (Forsskål, 1775)	1990-07-26	18:20–18:35					133.5	39.3	https://zukan.com/gyotaku/leaf83153
Yaeyama	Y36	75Y	Tackles and bait shop	P	スギ	Sugi	Rachycentron canadum (Linnaeus, 1766)	1994-03-28	19:00:00	石垣港	沖縄県石垣市				13	https://zukan.com/gyotaku/leaf83154
Yaeyama	Y37	76Y	Tackles and bait shop	P	シイラ	Shiira	Coryphaena hippurus Linnaeus, 1758	December, 1995						108	8	https://zukan.com/gyotaku/leaf83155
Yaeyama	Y37	77Y	Tackles and bait shop	P	シイラ	Shiira	Coryphaena hippurus Linnaeus, 1758	December, 1995								https://zukan.com/gyotaku/leaf83155
Yaeyama	Y38	78Y	Tackles and bait shop	P	アカジン	Akajin	Plectropomus leopardus (Lacepède, 1802)								4.4	https://zukan.com/gyotaku/leaf83156
Yaeyama	Y39	79Y	Tackles and bait shop	P				1996-09-09	06:00:00					82	7.5	https://zukan.com/gyotaku/leaf83157
Yaeyama	Y40	80Y	Tackles and bait shop	P	シーラ	Shīra	Coryphaena hippurus Linnaeus, 1758	1996-05-04						140	13.4	https://zukan.com/gyotaku/leaf83158
Yaeyama	Y41	81Y	Tackles and bait shop	P				1984-12-07	23:00:00	新川漁港防波堤	沖縄県石垣市			38	1.1	https://zukan.com/gyotaku/leaf83159
Yaeyama	Y42	82Y	Tackles and bait shop	P	オニカマス	Onikamasu	Sphyraena barracuda (Edwards, 1771)	2003-02-27						170	28	https://zukan.com/gyotaku/leaf83160
Yaeyama	Y43	83Y	Tackles and bait shop	P				1997-06-17	06:05:00							https://zukan.com/gyotaku/leaf83161
Yaeyama	Y44	84Y	Tackles and bait shop	P	アーラミーバイ	Āramībai	Epinephelus sp.	2000-03-03		名蔵湾沖	沖縄県石垣市名蔵				18	https://zukan.com/gyotaku/leaf83162
Yaeyama	Y45	85Y	Tackles and bait shop	P	ローニンアジ	Rōninaji	Caranx ignobilis (Forsskål, 1775)	2004-03-13		名蔵湾沖	沖縄県石垣市名蔵				25	https://zukan.com/gyotaku/leaf109959
Yaeyama	Y46	86Y	Tackles and bait shop	P												https://zukan.com/gyotaku/leaf109960
